# Supplementary material
Source: Springer Nature journal article supplement (https://www.springermedizin.de/resource/supplementary/12885_2006_824_MOESM2_ESM.pdf/9470426)

A. Development of Invasive Disease by Texture (Difference Entropy)

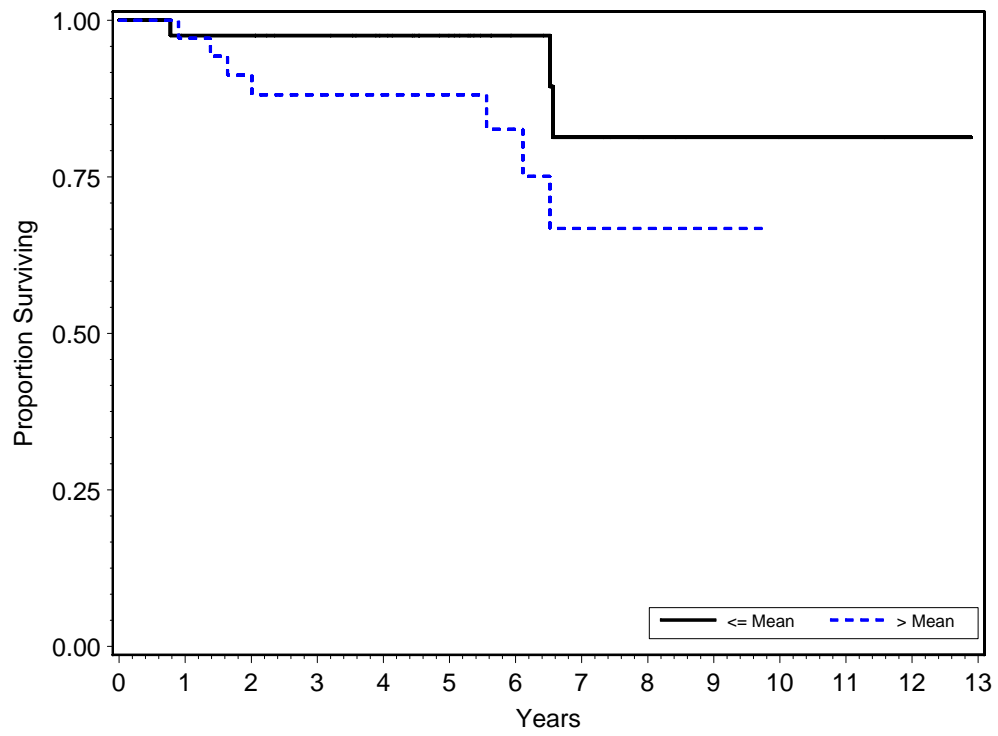

B. Development of Invasive Disease by Texture (Contrast)

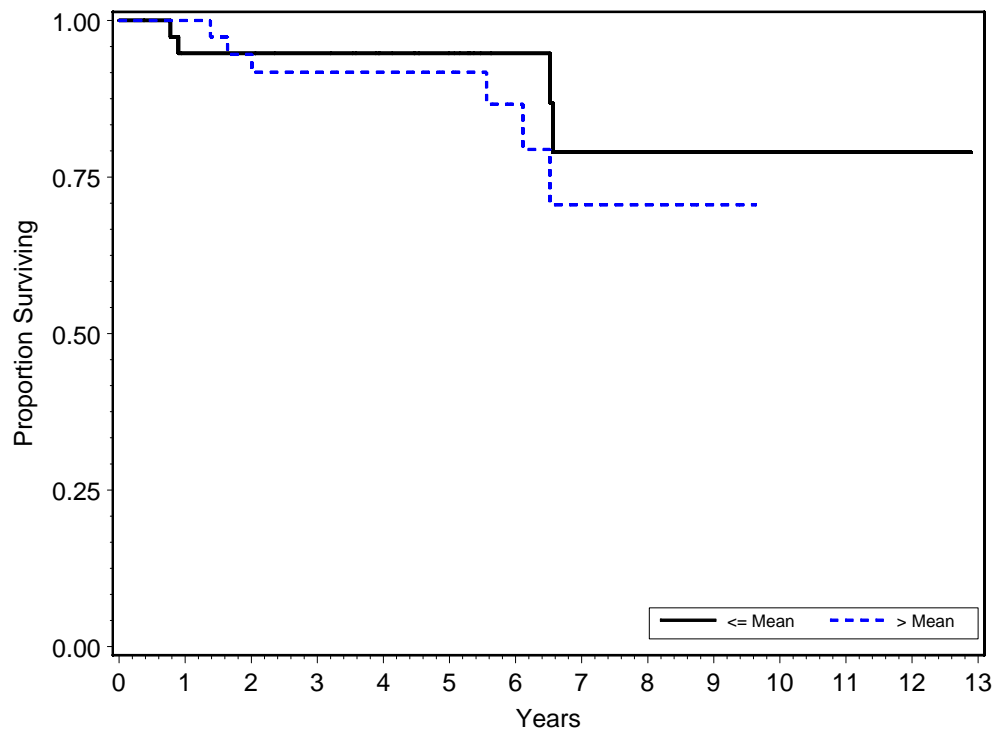

Supplement: MOESM2 [file 9470426]
